# Supplementary material for: Exposure Medium: Key in Identifying Free Ag+ as the Exclusive Species of Silver Nanoparticles with Acute Toxicity to Daphnia magna
Source: PubMed Central journal article supplement (PMC4392358; doi:10.1038/srep09674), 2015-04-10
Supplement: srep09674-s1.pdf [file srep09674-s1.pdf]

# Supporting Information

for

## Exposure Medium: Key in Identifying Free $\text{Ag}^+$ as the Exclusive Species of Silver Nanoparticles with Acute Toxicity to *Daphnia magna*

Mo-Hai Shen<sup>†</sup>, Xiao-Xia Zhou<sup>†</sup>, Xiao-Ya Yang<sup>†,‡</sup>, Jing-Bo Chao<sup>§</sup>, Rui Liu<sup>†</sup>, and Jing-Fu Liu<sup>†,\*</sup>

<sup>†</sup>State Key Laboratory of Environmental Chemistry and Ecotoxicology, Research Center for Environmental Sciences, Chinese Academy of Sciences, P. O. Box 2871, Beijing 100085, China.

<sup>‡</sup>School of the Environment, Jiangsu University, Zhenjiang 212013, China.

<sup>§</sup>Chemical Metrology and Analytical Science Division, National Institute of Metrology, Beijing 100013, China.

This Supporting Information includes a total of 11 pages (including this page) with four sections for experimental, references, 4 tables, and 4 figures.

\* Corresponding author: E-mail: jfliu@rcees.ac.cn

Tel.: +86-10-62849192; Fax: +86-10-62849192

## 23 **EXPERIMENTAL**

24 **Synthesis of AgNPs.** To prepare the polyvinylpyrrolidones (PVP) coated small sized AgNP  
25 (AgNP<sub>PVP10</sub>), 0.375 g PVP (molecular weight, MW=58,000) was dissolved in 70 mL ultrapure water.  
26 Then, 2.25 mL of 0.1 mol L<sup>-1</sup> AgNO<sub>3</sub> was added into the solution, and the mixture was stirred for 5 min  
27 before 2.75 mL of ice-cold NaBH<sub>4</sub> (0.08 mol L<sup>-1</sup>) was added all at once. The mixture was stirred in ice-  
28 cold bath for further 30 min.<sup>1</sup> The PVP coated AgNPs were washed using 100 kDa Ultra-15 centrifugal  
29 filter and centrifuged for 30 min at 5000 rpm by a Sigma 3-18 K centrifuge (St. Louis, MO). The  
30 residue upon the filter was redispersed in additional 10 mL ultrapure water for further purification. The  
31 wash procedure was repeated for three times.

32 To synthesize PVP coated large sized AgNP (AgNP<sub>PVP28</sub>), 10 g PVP (MW=10,000) was dissolved in 75  
33 mL ethylene glycol, 400 mg AgNO<sub>3</sub> was added into the solution. The suspension was stirred until  
34 complete dissolution of AgNO<sub>3</sub> was achieved. The solution was then heated up to 120 °C at a constant  
35 rate of 1 °C min<sup>-1</sup>, and was kept at 120 °C for 1 h allowing the reaction fully proceeded. The colloidal  
36 dispersion was cooled in tap water, at the end of the reaction period, until the system reached room  
37 temperature.<sup>2</sup> The AgNPs can be separated easily from the ethylene glycol after adding acetone (V:V,  
38 1:4) followed by centrifugation for 25 min at 7000 rpm. Then, the collected AgNPs were washed by  
39 adding ultrapure water followed by centrifugation for 25 min at 7000 rpm. The water-wash procedure  
40 was repeated for three times. The obtained AgNPs was collected and washed by ultrapure water using  
41 100 kDa Ultra-15 centrifugal filter and centrifuged for 30 min at 3000 rpm. The residue upon the filter  
42 was redispersed in additional 10 mL ultrapure water for further purification. The ultrafiltration wash  
43 procedure was repeated for three times.

44 Stock suspensions of the two AgNPs were prepared by redispersion of the PVP coated AgNPs with  
45 ultrapure water. The transmission electron microscopy (TEM) samples of AgNPs were prepared by  
46 loading 10 µL aliquots of suspensions at proper concentrations onto ultrathin carbon-coated copper grid,  
47 and drying at room temperature. The size distribution of AgNPs were determined using Nano Measurer  
48 1.2 (Informer Technologies, Inc.) and Gaussian fitting, with at least 133 particles counted from multi-

49 TEM-images in AgNP<sub>PVP</sub> cases. Since the sizes of commercial AgNP<sub>CITs</sub> were relatively uniform, the  
50 graphs of statistic distribution of nanoparticle sizes were not presented anymore. The stock suspensions  
51 were stored in dark at 4 °C.

52

### 53 REFERENCES

- 54 1 Yang, X. *et al.* Mechanism of silver nanoparticle toxicity is dependent on dissolved silver and  
55 surface coating in caenorhabditis elegans. *Environ. Sci. Technol.* **46**, 1119-1127 (2012).
- 56 2 Silvert, P. Y., HerreraUrbina, R., Duvauchelle, N., Vijayakrishnan, V. & Elhsissen, K. T.  
57 Preparation of colloidal silver dispersions by the polyol process Part 1-Synthesis and  
58 characterization. *J. Mater. Chem.* **6**, 573-577 (1996).

59

60 **Table S1.** The calculated 8-h median lethal concentrations (LC50<sub>8-h</sub>) and concentration range of lethal effect of AgNPs and AgNO<sub>3</sub> suspensions to  
 61 *Daphnia magna* ( $p < 0.05$ ).

| AgNP type                               | LC50 <sub>8-h</sub> as nominal total Ag<br>( $\mu\text{g L}^{-1}$ ) | Concentration range of lethal effect ( $\mu\text{g L}^{-1}$ ) |                         |
|-----------------------------------------|---------------------------------------------------------------------|---------------------------------------------------------------|-------------------------|
|                                         |                                                                     | Letha probability (1%)                                        | Letha probability (99%) |
| AgNP <sub>PVP10</sub>                   | 5.04 $\pm$ 0.84                                                     | 1.05                                                          | 24.04                   |
| AgNP <sub>PVP28</sub>                   | 16.37 $\pm$ 2.08                                                    | 4.70                                                          | 57.00                   |
| AgNP <sub>CIT10</sub>                   | 6.31 $\pm$ 0.69                                                     | 1.95                                                          | 20.40                   |
| AgNP <sub>CIT20</sub>                   | 39.47 $\pm$ 1.40                                                    | 28.78                                                         | 54.13                   |
| AgNP <sub>CIT40</sub>                   | 102.59 $\pm$ 5.80                                                   | 49.95                                                         | 210.72                  |
| AgNP <sub>CIT60</sub>                   | 116.59 $\pm$ 5.68                                                   | 75.82                                                         | 179.27                  |
| AgNP <sub>CIT100</sub>                  | 144.25 $\pm$ 9.47                                                   | 73.49                                                         | 283.12                  |
| Ag <sup>+</sup> (in AgNO <sub>3</sub> ) | 0.78 $\pm$ 0.10                                                     | 0.34                                                          | 1.79                    |

**Table S2.** Measured concentrations of different Ag species and total Ag in AgNP and AgNO<sub>3</sub> suspensions equivalent to LC50<sub>8-h</sub>.

| AgNP type                               | Free Ag <sup>+</sup><br>(μg L <sup>-1</sup> ) | Total Ag <sup>+</sup><br>(μg L <sup>-1</sup> ) | Dissolved Ag<br>(μg L <sup>-1</sup> ) | Nano Ag<br>(μg L <sup>-1</sup> ) | Measure Total Ag<br>(μg L <sup>-1</sup> ) |
|-----------------------------------------|-----------------------------------------------|------------------------------------------------|---------------------------------------|----------------------------------|-------------------------------------------|
| AgNP <sub>PVP10</sub>                   | 0.44 ± 0.13                                   | 1.40 ± 0.07                                    | 1.41 ± 0.04                           | 3.28 ± 0.19                      | 4.68 ± 0.12                               |
| AgNP <sub>PVP28</sub>                   | 0.42 ± 0.06                                   | 1.07 ± 0.02                                    | 1.42 ± 0.09                           | 12.94 ± 0.15                     | 14.01 ± 0.12                              |
| AgNP <sub>CIT10</sub>                   | 0.44 ± 0.07                                   | 1.05 ± 0.01                                    | 1.12 ± 0.02                           | 4.65 ± 0.02                      | 5.70 ± 0.02                               |
| AgNP <sub>CIT20</sub>                   | 0.37 ± 0.02                                   | 1.32 ± 0.04                                    | 0.91 ± 0.05                           | 34.92 ± 2.13                     | 36.25 ± 2.09                              |
| AgNP <sub>CIT40</sub>                   | 0.44 ± 0.09                                   | 2.01 ± 0.24                                    | 1.15 ± 0.02                           | 83.78 ± 1.04                     | 85.79 ± 0.79                              |
| AgNP <sub>CIT60</sub>                   | 0.43 ± 0.06                                   | 2.62 ± 0.15                                    | 1.58 ± 0.09                           | 107.36 ± 1.33                    | 109.98 ± 1.18                             |
| AgNP <sub>CIT100</sub>                  | 0.41 ± 0.05                                   | 2.15 ± 0.11                                    | 0.99 ± 0.09                           | 124.35 ± 6.96                    | 126.51 ± 6.85                             |
| Ag <sup>+</sup> (in AgNO <sub>3</sub> ) | 0.40 ± 0.05                                   | NA <sup>a</sup>                                | NA                                    | NA                               | 0.44 ± 0.01                               |

<sup>a</sup>NA= not available

**Table S3.** Proportions of different Ag species in AgNP suspensions at LC50<sub>8-h</sub> as total Ag.

| AgNP type              | Free Ag <sup>+</sup> (%) | Total Ag <sup>+</sup> (%) | Dissolved Ag (%) | Nano Ag (%)  |
|------------------------|--------------------------|---------------------------|------------------|--------------|
| AgNP <sub>PVP10</sub>  | 9.31 ± 2.72              | 29.89 ± 1.46              | 30.11 ± 0.85     | 70.11 ± 3.98 |
| AgNP <sub>PVP28</sub>  | 2.98 ± 0.40              | 7.62 ± 0.17               | 10.13 ± 0.66     | 92.38 ± 1.04 |
| AgNP <sub>CIT10</sub>  | 7.63 ± 1.26              | 18.43 ± 0.05              | 19.73 ± 0.39     | 81.57 ± 0.39 |
| AgNP <sub>CIT20</sub>  | 1.02 ± 0.06              | 3.64 ± 0.10               | 2.52 ± 0.14      | 96.36 ± 5.87 |
| AgNP <sub>CIT40</sub>  | 0.52 ± 0.10              | 2.34 ± 0.28               | 1.34 ± 0.03      | 97.66 ± 1.21 |
| AgNP <sub>CIT60</sub>  | 0.39 ± 0.05              | 2.38 ± 0.14               | 1.44 ± 0.08      | 97.62 ± 1.21 |
| AgNP <sub>CIT100</sub> | 0.32 ± 0.04              | 1.70 ± 0.08               | 0.78 ± 0.07      | 98.30 ± 5.50 |

64 **Table S4.** The analysis of variance (ANOVA) results (95% confidence interval)

| Ag species            | Significance ( $p$ ) <sup>a</sup> |                                                           |                                                        |
|-----------------------|-----------------------------------|-----------------------------------------------------------|--------------------------------------------------------|
|                       | Among AgNPs                       | vs free Ag <sup>+</sup> in AgNO <sub>3</sub> <sup>b</sup> | vs measured total Ag in AgNO <sub>3</sub> <sup>b</sup> |
| Free Ag <sup>+</sup>  | 0.91                              | 0.66                                                      | 0.64                                                   |
| Total Ag <sup>+</sup> | 6.9E-10                           | 1.3E-03                                                   | 1.7E-03                                                |
| Dissolved Ag          | 3.5E-08                           | 7.2E-06                                                   | 1.3E-05                                                |

<sup>a</sup> The  $p > 0.05$  indicates no significant difference,  $p < 0.05$  indicates significant difference.

<sup>b</sup> The free Ag<sup>+</sup> ( $0.40 \pm 0.05$ ) by ISE and measured total Ag ( $0.44 \pm 0.01$ ) by ICP-MS after digestion in AgNO<sub>3</sub> solution had no significant difference with each other ( $p = 0.27$ ).

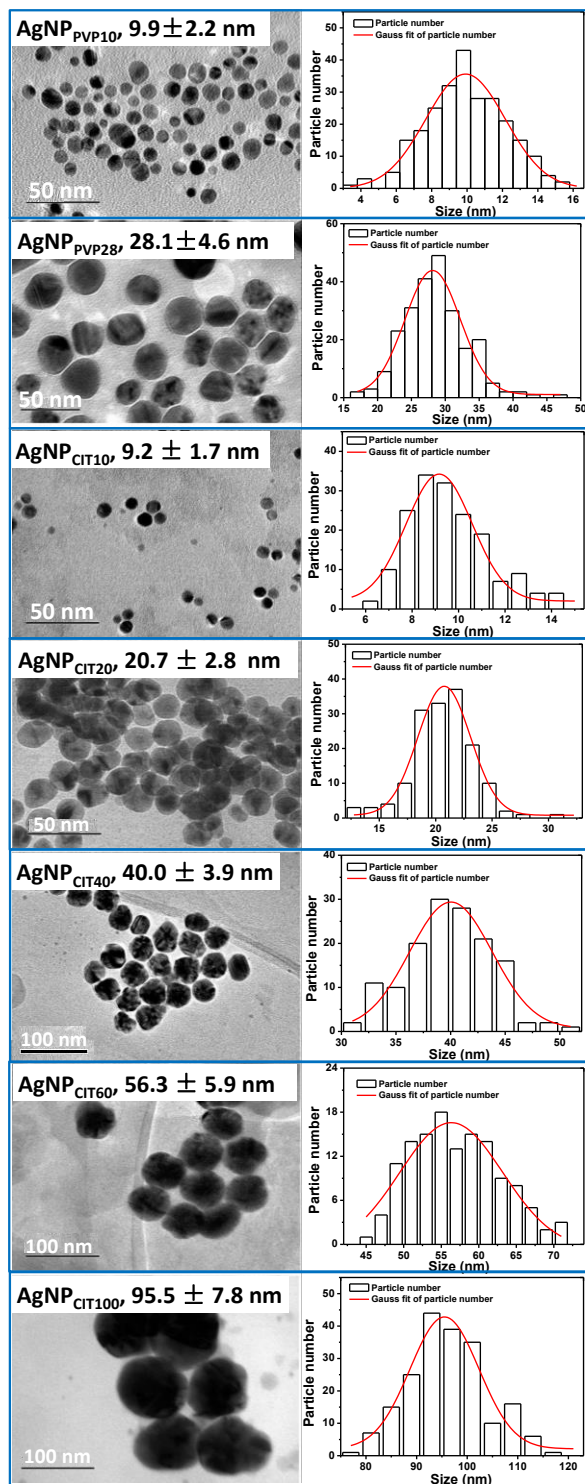

65

66 **Figure S1.** TEM images of AgNPs. Size distribution and primary size determination of each AgNP  
 67 were performed by measuring the diameter of more than 133 nanoparticles in multi-TEM images.  
 68



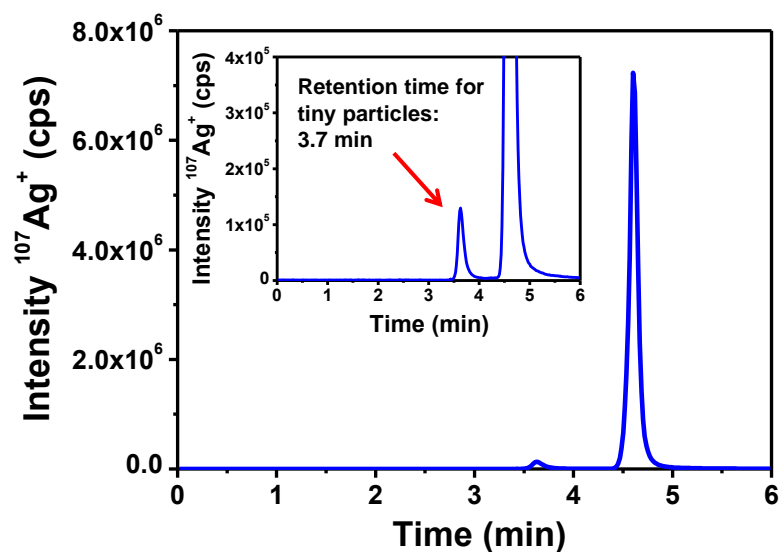

69

70 **Figure S2.** LC-ICP-MS separation and identification of tiny particles in dissolved Ag species of  
71  $\text{AgNP}_{\text{PVP10}}$  separated by centrifugal ultrafiltration. The appearance of the peak at ~3.7 min indicates the  
72 existence of tiny Ag particles. The large peak at ~4.6 min was assigned to  $\text{Ag}^+$ .

73

74 Measurement of Free  $\text{Ag}^+$  by Silver Ion-Selective Electrode (ISE) in AgNPs and  $\text{AgNO}_3$  (Figure  
75 S3-4)

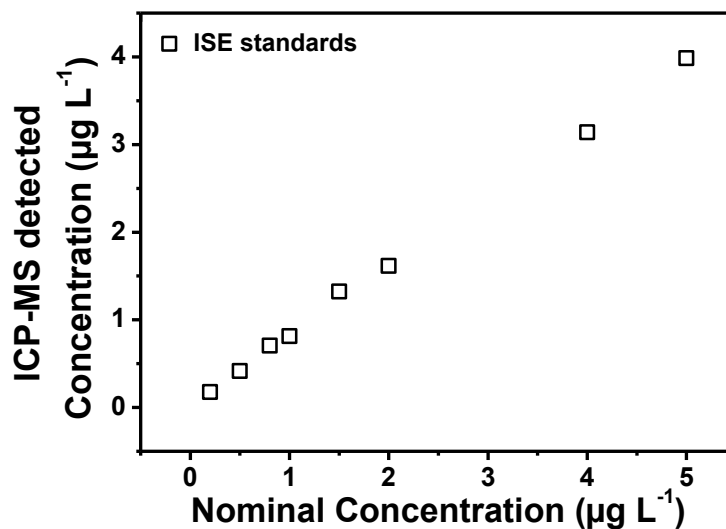

76

77 **Figure S3.** Concentrations of ISE standard measured by ICP-MS. Given the predictable sorption of  $\text{Ag}^+$   
78 to glass beakers after the preparation of standard solutions, the  $\text{Ag}^+$  concentrations of ISE standards  
79 were determined by ICP-MS simultaneously with the ISE standards' measurement. The ICP-MS  
80 detected concentrations were used to plotted against potential differences to prepare the calibration  
81 curve for ISE measurement of free  $\text{Ag}^+$  in AgNPs and  $\text{AgNO}_3$ .

82

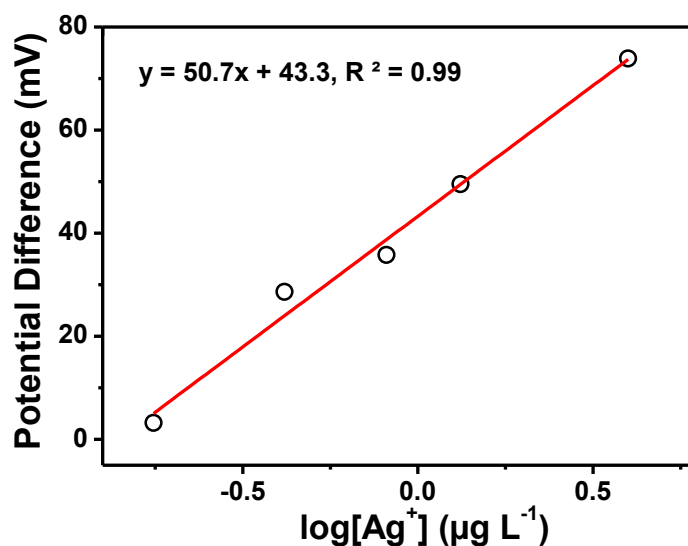

83

84 **Figure S4.** Representative calibration of ISE measurement in the range of 0.18-3.99 µg L<sup>-1</sup> Ag<sup>+</sup> (in  
 85 AgNO<sub>3</sub>, detected by ICP-MS) with a slope of 50.7 mV/log [Ag<sup>+</sup>]. The free Ag<sup>+</sup> (0.40 ± 0.05 µg L<sup>-1</sup>) by  
 86 ISE and total Ag (0.44 ± 0.01 µg L<sup>-1</sup>) measured by ICP-MS after digestion in AgNO<sub>3</sub> solution  
 87 equivalent to LC50<sub>8-h</sub> had no significant difference with each other (*p*=0.27). As the measured total Ag  
 88 is equivalent to free Ag<sup>+</sup> in AgNO<sub>3</sub> solution, the agreement between the free Ag<sup>+</sup> by ISE and total Ag by  
 89 ICP-MS suggested the free Ag<sup>+</sup> results determined by ISE method is credible.

90
